# Supplementary material for: Structure Prediction and Characterization of Thermostable Aldehyde Dehydrogenase from Newly Isolated Anoxybacillus geothermalis Strain D9
Source: MDPI journal article supplement (doi:10.3390/microorganisms10071444), 2022-07-18
Supplement: s1 [file s1]

## Supplemental results

### Optimization of ALDH expressions

#### Effect of hosts on ALDH expression

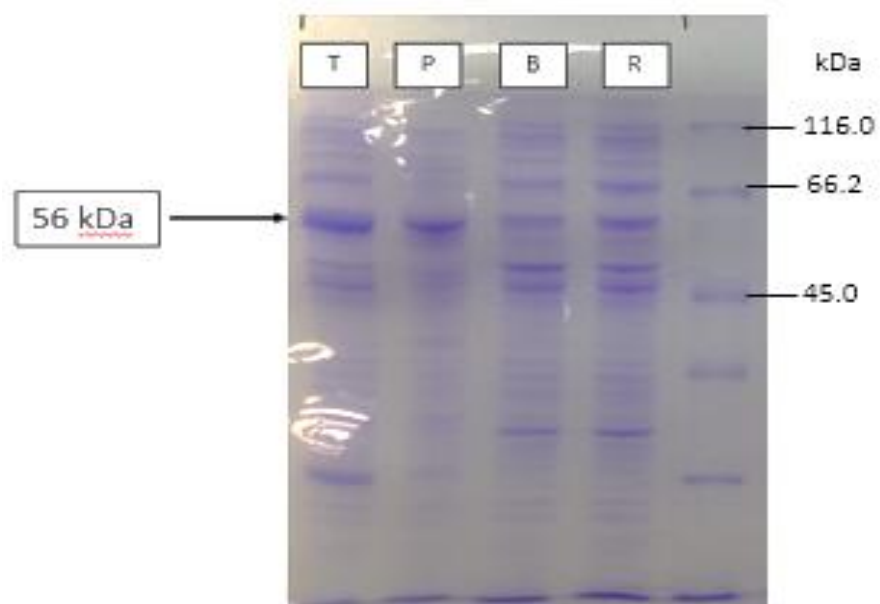

**Figure S1: Effect of expression hosts on the expression of aldehyde dehydrogenase.** M: Protein marker; T: *E. coli* Transetta (DE3); 2: *E. coli* Rosetta-gami (DE3); 3: *E. coli* BL21 (DE3) pLysS; 4: *E. coli* BL21 (DE3).

### Effect of induction time on ALDH expression

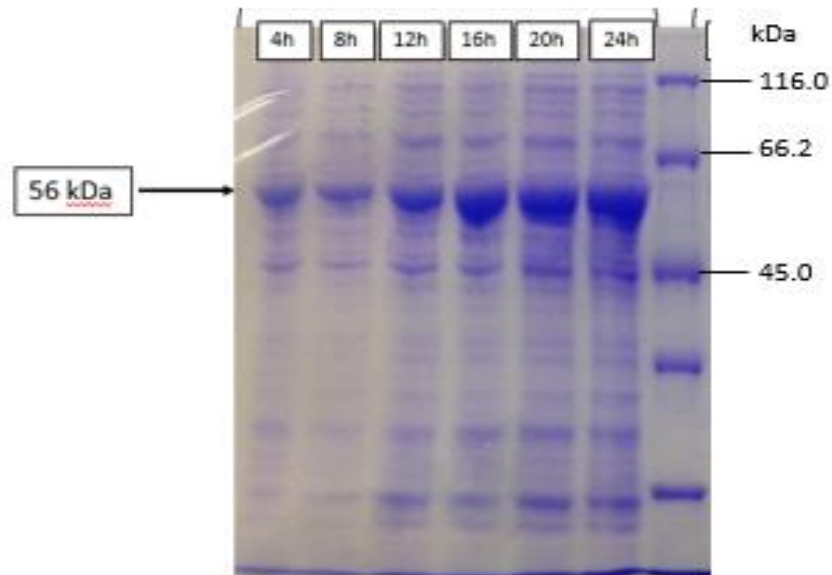

**Figure S2: Effect of induction time on the expression of aldehyde dehydrogenase.** M: Protein marker; 1: 4 h; 2: 8 h; 3: 12 h; 4: 16 h; 5: 20 h; 6: 24 h.

### Effect of induction temperature on ALDH expressions

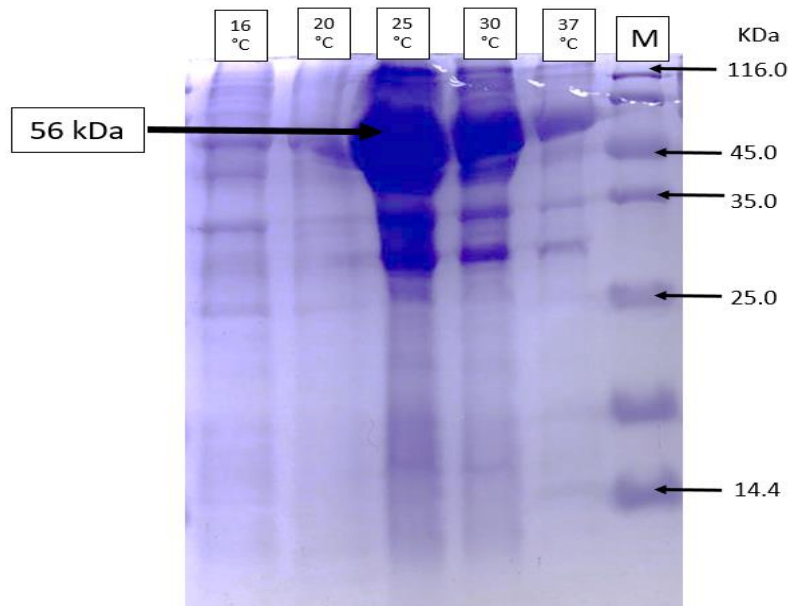

**Figure S3: Effect of temperature on the expression of aldehyde hydrogenase.** M: Protein marker; 1: 16 °C; 2: 20 °C; 3: 25 °C; 4: 30 °C; 5: 37 °C

### Effect of IPTG concentration on ALDH expression

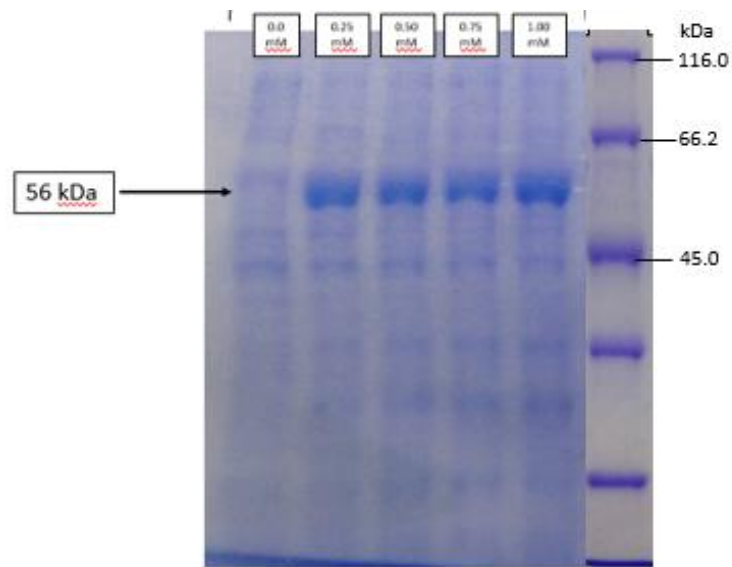

**Figure S4:** Effect of concentration of inducer on the expression of aldehyde dehydrogenase. M: Protein marker; 1: 0.00 mM; 2: 0.25 mM; 3: 0.50 mM; 4: 0.75 mM; 5: 1.00 mM

## Homology modelling of ALDH

| Enzymes                   | Program/<br>software | Template | Model                                                                             | Validation       |              |                  |                |                           |                   |
|---------------------------|----------------------|----------|-----------------------------------------------------------------------------------|------------------|--------------|------------------|----------------|---------------------------|-------------------|
|                           |                      |          |                                                                                   | Verify 3D<br>(%) | Errat<br>(%) | Ramacandran plot |                |                           |                   |
|                           |                      |          |                                                                                   |                  |              | Favoured<br>(%)  | Allowed<br>(%) | Generously<br>allowed (%) | Disallowed<br>(%) |
| Aldehyde<br>dehydrogenase | SWISS<br>MODEL       | 4O6R_A   | 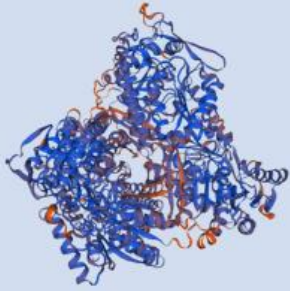 | 86.25            | 91.4405      | 90.4             | 8.8            | 0.5                       | 0.4               |

**Figure S5:** Homology modelling of ALDH by using the SWISS MODEL.

| Enzymes                   | Program/<br>software | Template | Model                                                                               | Validation       |           |                  |                |                               |                    |
|---------------------------|----------------------|----------|-------------------------------------------------------------------------------------|------------------|-----------|------------------|----------------|-------------------------------|--------------------|
|                           |                      |          |                                                                                     | Verify 3D<br>(%) | Errat (%) | Ramacandran plot |                |                               |                    |
|                           |                      |          |                                                                                     |                  |           | Favoured<br>(%)  | Allowed<br>(%) | Generousl<br>y allowed<br>(%) | Disallowe<br>d (%) |
| Aldehyde<br>dehydrogenase | RAPTORX              | 5FHZ_A   |  | 82.97            | 69.6099   | 91.5             | 6.5            | 1.2                           | 0.5                |

**Figure S6:** Homology modelling of ALDH by using the RaptorX.

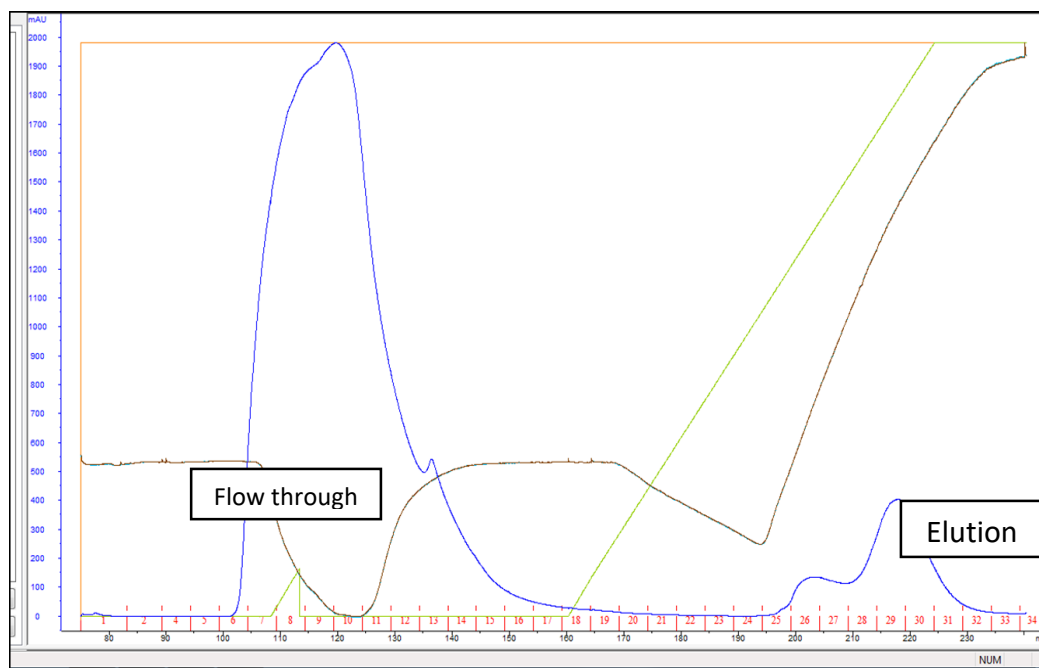

**Figure S7:** Chromatogram profile of the purified ALDH.
